# Supplementary material for: Acquired RAD51C Promoter Methylation Loss Causes PARP Inhibitor Resistance in High-Grade Serous Ovarian Carcinoma
Source: Oxford University Press journal article supplement (doi:10.1158/0008-5472.can-21-0774), 2021-07-28
Supplement: 00085472can210774-sup-261966_3_supp_7203785_qvqxdm.xlsx [file 00085472can210774-sup-261966_3_supp_7203785_qvqxdm.xlsx]

## Sheet: Supp. Table 1
Supplementary Table 1. PDX #183 and #1240 in vivo treatment response summary.
TTH – time to harvest; TTP – time to progression; SD – stable disease; CR – complete response.
PDX #183 vehicle values
Median TTH (days)	50
Average TTP (days)	8
PDX #183 cisplatin response
Response	Sensitive (CR)
Median TTH (days)	>120
Average TTP (days)	>120
p-value	<0.0001
PDX #183 rucaparib 300 mg/kg response
Response	Responsive (SD)
Median TTH (days)	74
Average TTP (days)	36
p-value	0.01
PDX #183 rucaparib 450 mg/kg response
Response	Responsive (SD)
Median TTH (days)	95
Average TTP (days)	47
p-value	<0.0001
PDX #183 niraparib 100 mg/kg response
Response	Responsive (SD)
Median TTH (days)	95
Average TTP (days)	50
p-value	<0.0001
PDX #1240 vehicle values
Median TTH (days)	25
Average TTP (days)	4
PDX #1240 cisplatin response
Response	Sensitive (CR)
Median TTH (days)	>120
Average TTP (days)	>120
p-value	<0.0001
PDX #1240 rucaparib 300 mg/kg response
Response	Responsive (SD)
Median TTH (days)	109
Average TTP (days)	81
p-value	0.013345

## Sheet: Supp. Table 2
Supplementary Table 2. BROCA sequencing results for #183 and #1240 patient and PDX samples.
Both #183 patient and PDX samples carry a deleterious TP53 mutation and loss of one copy of PTEN. The heterozygous PARP1 mutation detected in the PDX affects the regulatory domain of the protein. In silico prediction in mutation taster (Schwarz et al., 2014) indicated that this mutation is pathogenic, but it was not reported as a PARPi-resistance mutation in published CRISPR screens (Pettitt et a…
Model - sample	Variant-type (short variant, CNV, rearrangement)	Gene	Transcript	c.DNA change	Protein change	Genomic position (hg19)	Coverage (reads)	% Variant Allele	Copy Number Estimate	CNV exons	CNV type	CNV reads	ExAC / 1000 genomes frequencies	In silico prediction
#183 - Patient tumor	short-variant	TP53	NM_000546	c.661G>T	p.E221X	chr17:7578188	182	0.642857					Absent in both	Pathogenic
	CNV	PTEN	NM_000314			chr10:89592934-89718404			1	1-7	LOSS	30|16
#183 - PDX tumor #7903	short-variant	TP53	NM_000546	c.661G>T	p.E221X	chr17:7578188	105	0.990476					Absent in both	Pathogenic
	short-variant	PARP1	NM_001618	c.2008C>A	p.Q670K	chr1:226561989	254	0.507874					Absent in both	Pathogenic
	CNV	PTEN	NM_000314			chr10:89592934-89718404			1	1-7	LOSS	52|19
#1240 - Patient tumor	short-variant	ATM	NM_000051	c.2638+4A>G		chr11:108138073	489	0.648262					Absent in both	Pathogenic
	short-variant	XRCC4	NM_022550	c.970A>C	p.N324H	chr5:82649026	636	0.610063					ExAC: 0.0002 1000g: 0.000199681	Pathogenic
	short-variant	CHEK1	NM_001114122	c.829C>T	p.R277X	chr11:125513701	482	0.325726					ExAC: 0.00003793 Absent in 1000g	Assumed pathogenic (stopgain)
	CNV	FANCL	NM_018062	c.156_1220del	p.R52fs	chr2:58386808-58458714			1	3-14	DEL	446|60
	short-variant	TP53	NM_000546	c.920-1G>A		chr17:7576927	494	0.757085					Absent in both	Pathogenic

## Sheet: Supp. Table 3
Supplementary Table 3. PDX PH039-A and PH039-B in vivo treatment response summary.
TTH – time to harvest; TTP – time to progression; SD – stable disease; CR – complete response.
PDX PH039-A vehicle values		PDX PH039-B vehicle values
Median TTH (days)	8	Median TTH (days)	15
Average TTP (days)	4	Average TTP (days)	4
p-value comparing lineages	0.0148
PDX PH039-A cisplatin response		PDX PH039-B cisplatin response
Response	Sensitive (CR)	Response	Sensitive (CR)
Median TTH (days)	>120	Median TTH (days)	109
Average TTP (days)	>120	Average TTP (days)	106
p-value	0.0008	p-value	0.001
p-value comparing lineages	0.1269
PDX PH039-A rucaparib 300 mg/kg response		PDX PH039-B rucaparib 300 mg/kg response
Response	Responsive (SD)	Response	Responsive (PR)
Median TTH (days)	53	Median TTH (days)	67
Average TTP (days)	43	Average TTP (days)	60
p-value	0.0004	p-value	0.0669
p-value comparing lineages	0.2275
PDX PH039-A rucaparib 450 mg/kg response		PDX PH039-B rucaparib 450 mg/kg response
Response	Responsive (SD)	Response	Responsive (CR)
Median TTH (days)	60	Median TTH (days)	88
Average TTP (days)	50	Average TTP (days)	71
p-value	0.0003	p-value	0.0011
p-value comparing lineages	0.0004
PDX PH039-A niraparib 100 mg/kg response		PDX PH039-B niraparib 100 mg/kg response
Response	Responsive (SD)	Response	Responsive (CR)
Median TTH (days)	53	Median TTH (days)	71
Average TTP (days)	43	Average TTP (days)	64
p-value	0.0002	p-value	0.0508
p-value comparing lineages	0.0766

## Sheet: Supp. Table 4
Supplementary Table 4. PH039 Lineage B contains multiple tumours with "shifted heterogeneous" meRAD51C profile.
MS-HRM meRAD51C profiles for vehicle-treated PDX aliquots from PH039 lineages A and B, where "right-shifted heterogeneous" represents heterogeneous MS-HRM curves are shifted towards to the 100% methylated control curve (i.e. slightly more methylated).
PH039 Lineage	PDX aliquot	Transplant	meRAD51C profile
A	12970	T4	Heterogeneous
A	12971	T4	Heterogeneous
A	13039	T4	Heterogeneous
A	13288	T5	Heterogeneous
A	14002	T7	Heterogeneous
A	14179	T8	Heterogeneous
B	13070	T4	Heterogeneous
B	13071	T4	Right-shifted heterogeneous
B	13368	T5	Right-shifted heterogeneous
B	13381	T5	Right-shifted heterogeneous
B	13939	T6	Heterogeneous
B	14224	T7	Heterogeneous

## Sheet: Supp. Table 5
Supplementary Table 5. Summary of all results for meRAD51C loss screening by MS-HRM.
164 tumour aliquots tested in total (across all PDX models)
Treatment	Tumours with 0% meRAD51C		Tumours with 1-50% meRAD51C		Tumours with 51-99% meRAD51C		Tumours with 100% meRAD51C		Tumours with meRAD51C curve shift
PDX #183
Vehicle	0/21	0	0/21	0	0/21	0	0/21	0	1/21	0.047619
Niraparib 100mg/kg	0/7	0	1/7	0.00142857	0/7	0	6/7	0.857143	1/7	0.142857
Rucaparib 300mg/kg	0/12	0	1/12	0.0833333	0/12	0	11/12	0.916667	0/12	0
Rucaparib 450mg/kg	0/10	0	0/10	0	0/10	0	10/10	1	0/10	0
Rucaparib 300mg/kg cycle 2	0/7	0	0/7	0	0/7	0	7/7	1	0/7	0
Rucaparib 300mg/kg cycle 3	0/2	0	0/2	0	0/2	0	2/2	1	0/2	0
Rucaparib 300mg/kg cycle 4	0/11	0	0/11	0	3/11	0.272727	8/11	0.727273	0/11	0
Cisplatin 4mg/kg	0/7	0	0/7	0	1/7	0.142857	6/7	0.857143	0/7	0
PDX PH039-A
Vehicle	0/6	0	0/6	0	0/6	0	0/6	0	0/6	0
Niraparib 100mg/kg	0/4	0	1/4	0.25	0/4	0	0/4	0	0/4	0
Rucaparib 300mg/kg	0/7	0	2/7	0.285714	2/7	0.285714	3/7	0.428571	1/7	0.142857
Rucaparib 450mg/kg	1/6	0.166667	2/6	0.333333	0/6	0	3/6	0.5	0/6	0
Rucaparib 450mg/kg cycle 2	1/3	0.333333	0/3	0	0/3	0	2/3	0.666667	0/3	0
Rucaparib 450mg/kg cycle 3	3/3	1	0/3	0	0/3	0	0/3	0	0/3	0
PDX PH039-B
Vehicle	0/6	0	0/6	0	0/6	0	6/6	1	3/6	0.5
Niraparib 100mg/kg	0/4	0	0/4	0	0/4	0	4/4	1	1/4	0.25
Rucaparib 300mg/kg	0/4	0	0/4	0	0/4	0	4/4	1	0/4	0
Rucaparib 450mg/kg	1/5	0.2	2/5	0.4	0/5	0	2/5	0.4	0/5	0
Rucaparib 450mg/kg cycle 2	1/1	1	0/1	0	0/1	0	0/1	0	0/1	0
Rucaparib 450mg/kg cycle 3	5/5	1	0/5	0	0/5	0	0/5	0	0/5	0
Cisplatin 4mg/kg	0/3	0	0/3	0	0/3	0	0/3	1	3/3	0

## Sheet: Supp. Table 6
Supplementary Table 6. PDX #183 in vivo rucaparib re-treatment response summary.
TTH – time to harvest; TTP – time to progression.
PDX #183 vehicle values
Median TTH (days)	50
Average TTP (days)	8
PDX #183 vehicle (following rucaparib cycle 2)
Median TTH (days)	43
Average TTP (days)	8
p-value	0.475
PDX #183 rucaparib cycle 2
Median TTH (days)	116
Average TTP (days)	47
p-value	<0.0001
PDX #183 rucaparib cycle 4
Median TTH (days)	99
Average TTP (days)	36
p-value	<0.0001

## Sheet: Supp. Table 7
Supplementary Table 7. Extended clinical information for the patient cohort.
Samples grouped by meRAD51C pattern (homogeneous vs heterogeneous), and platinum TFI. Refractory defined as progressive disease on chemotherapy, resistant as PR or recurrence/progression within 6 months of end of chemotherapy and sensitive as recurrence/progression more than 6 months after end of chemotherapy. DOD – Died of disease; CR – complete response; PR – partial response; PD – progressive …
Patient ID	Surgical outcome	Lines of therapy received			First platinum TFI	Primary platinum status	Survival	Neoplastic cellularity (qpure %)	RAD51C copy number	Methylated alleles %	Adjusted meRAD51C	meRAD51C profile	Age at diagnosis	FIGO Staging	Histology	Neo-adjuvant chemo	Sample type	Disease course summary
		Total	Platinum	Prior to sample collection
LS-158	<5mm	1	1	0	87 months	Sensitive	87 months at last FU, alive	90.2558	2	93	1	Homogeneous	39	IIIC	Serous Carcinoma	No	Primary tumor, primary surgery, snap-frozen	Sample taken at primary surgery. Adjuvant treatment with carboplatin / paclitaxel / topotecan (CR). Patient remains in first remission, with no evidence of disease at last follow-up.
LS-215	No residual disease	3	3	0	22 months	Sensitive	41 months, DOD	56.4297	2	72	1	Homogeneous	59	IV	Poorly Differentiated	No	Primary tumor, primary surgery, snap-frozen	Sample taken at primary surgery. First line treatment with carboplatin / paclitaxel (CA125 normalization). Intra-abdominal disease and liver metastases after 18 months. Two additional lines of platinum chemotheray recieved, but patient chose to discontinue third line and died soon after.
LS-267	Suboptimal debulk	3	1	0	18 months	Sensitive	24 months, DOD	58.9287	2	75	1	Homogeneous	63	IIIC	Serous Carcinoma	No	Primary tumor, primary surgery, snap-frozen	Sample taken at primary surgery. First line carboplatin / paclitaxel (CA125 normalization, negative CT), with monthly paclitaxel as maintenance therapy. Rising CA125 after 9 months, evidence of ascites and metastatic disease on CT. Monthly liposomal doxorubicin / bevacizumab 4 months (SD) until rising CA125. Gemcitabine / bevacizumab for 2 months (SD). Therapy discontinued (medical complications)…
AOCS-106	Macroscopic disease ≤1 cm	2	1	1	4 months	Resistant (sample post-neoadjuvent chemotherpay)	12 months, DOD	92.1363	3	55	0.58	Homogeneous and heterozygous	64	IIIC	Serous Carcinoma	Yes	Primary tumor, interval debulk, snap frozen	Neoadjuvant carboplatin / paclitaxel, sample taken at primary surgery nine months later. Second line peglyated liposomal doxorubicin started 7 months after surgery. Patient died due to disease progression.
LS-376	No residual disease	5	3	0	2 months	Resistant	25 months, DOD	95.5593	3	89	0.92	Homogeneous	61	IIIC	Serous Carcinoma	No	Primary tumor, primary surgery, snap-frozen	Sample taken at primary surgery. First line carboplatin / paclitaxel. Second line carboplatin/ gemcitabine / PARPi (veliparib). Ascites and elevated CA125 five and a half months post-chemotherapy. Third line topotecan/ bevacizumab (progressive ascites). Switched to nab-paclitaxel for two months. One cycle of carboplatin before dying two months later.
LS-28	Suboptimal debulk, >2cm	≥1	≥1	0	N/A	Refractory	25 months, DOD	N/A	N/A	72	N/A	Homogeneous	54	IIIC	Serous Carcinoma	No	Primary tumor, primary surgery, snap-frozen	Sample taken at primary surgery. First line carboplatin/ paclitaxel (CA125 normalization) . Six months post-surgery small positive foci detected in periaortic lymph nodes. Second line topotecan (PD). No further treatment records available until her death 19 months after second surgery.
AOCS-120	Macroscopic disease ≤1 cm	6	4	6	17 months	Sensitive (sample from resistant recurrence)	76 months, DOD	92.8684	3	96	1	Heterogeneous	46	IIIC	Serous Carcinoma	No	Resistant recurrence, ascites, snap frozen	First line carboplatin / paclitaxel / gemcitabine. 17 months later second line carboplatin / paclitaxel. 20 months later third line carboplatin / gemcitabine. Six months later fourth line carboplatin. Nine months later fifth line pegylated liposomal doxorubicin. Three months later, another line (6th) of pegylated liposomal doxorubicin. Sample taken one month after end of final therapy. Death due …
AOCS-143	Macroscopic disease ≤1 cm	9	6	0	7 months	Sensitive	69 months, DOD	78.3	2	81	1	Heterogeneous	49	IIIC	Serous Carcinoma	No	Primary tumour, primary surgery, snap-frozen	Sample taken at primary surgery. First line carboplatin / paclitaxel, second line pegylated liposomal doxorubicin, third line carboplatin / gemcitabine. Tamoxifen. Fourth line docetaxel. Fifth line carboplatin / docetaxel / etoposide. One month later sixth line cisplatin / etoposide. Four months later seventh line cisplatin. Five months later eight line paclitaxel. One month later ninth line cisp…
LS-473	Suboptimal debulk, 3-4cm	6	3	1	6 months	Resistant (sample post-neoadjuvent chemotherpay)	45 months, DOD	79.4348	4	86	0.97	Heterogeneous	51	IIIC	Serous Carcinoma	Yes	Primary tumor, primary surgery, snap-frozen	Neoadjuvant carboplatin / paclitaxel (PR). Sample obtained at interval debulking surgery. Carboplatin / paclitaxel / bevacizumab post-surgery. Complete metabolic response (PET scan). Rising CA125 and PD just prior to six months post chemotherapy, thus re-commenced carboplatin / paclitaxel / bevacizumab. Rising CA125 and PD after seven months. Third line gemcitabine (rising CA125 and abdominal sym…
LS-472	Suboptimal debulk, 1.5cm	4	1	0	N/A	Resistant	26 months, DOD	97.3555	1	94	0.99	Heterogeneous	54	IIIC	Serous Carcinoma	No	Primary tumor, primary surgery, snap-frozen	Sample taken at primary surgery. First line dose-dense paclitaxel/ carboplatin (normalization of CA125), but persistent disease. Additional three lines of chemotherapy (bevacizumab, topotecan, Doxil) with PD on all.
LS-467	No residual disease	N/A	N/A	0	N/A	N/A	N/A	75.9053	3	88	1	Heterogeneous	67	IIB	Serous & Clear Cell	No	Primary tumor, primary surgery, snap-frozen	Sample taken at primary surgery. Patient lost to follow-up from commencement of first-line chemotherapy (carboplatin/ paclitaxel, one month after surgery).
SFRC-1307	Suboptimal debulk	0	0	0	N/A	N/A	3 months at last FU, alive	N/A	N/A	N/A	N/A	Heterogeneous*	45	IIIC	Serous Carcinoma	No	Primary tumor, primary surgery, snap-frozen	Sample taken at primary surgery. Patient yet to begin treatment plan of adjuvant chemotherapy / bevacizumab.

## Sheet: Supp. Table 8
Supplementary Table 8. Adjusted meRAD51C for two pieces of tumor LS-473
Methylation calculated using targeted bisulfite NGS data.
Patient LS-473	Neoplastic cellularity (%)	RAD51C copy number	Methylated alleles %	Adjusted meRAD51C	meRAD51C profile
Piece 1	79.4348	4	86	0.97	Heterogeneous
Piece 2	89	4	80	0.85	Heterogeneous
